# Supplementary material
Source: PubMed Central journal article supplement (PMC4388619)
Supplement: embr0016-0528-sd4.pdf [file embr0016-0528-sd4.pdf]

Manuscript EMBOR-2014-39092

**Intellectual disability associated dBRWD3 regulates gene expression through inhibition of HIRA/YEM-mediated chromatin deposition of Histone H3.3**

Wei-Yu Chen, Hsueh-Tzu Shih, Kuei-Yan Liu, Zong-Siou Shih, Li-Kai Chen, Tsung-Han Tsai, Mei-Ju Chen, Hsuan Liu, Bertrand Chin-Ming Tan, Chien-Yu Chen, Hsiu-Hsiang Lee, Benjamin Loppin, Ounissa Ait-Ahmed and June-Tai Wu

*Corresponding author: June-Tai Wu, Institute of Molecular Medicine*

---

**Review timeline:**

Submission date:  
Accepted:

03 September 2014  
16 January 2015

---

**Transaction Report:**

(Note: No Peer Review Process File is available with this article, as the authors have chosen not to make the review process public in this case.)
